# Supplementary material for: Cu+ assisted preparation of mesoporous Pt-organic composites for highly selective and sensitive non-enzymatic glucose sensing
Source: Royal Society of Chemistry journal article supplement (doi:10.1039/c3tb21688h), 2014-01-01
Supplement: c3tb21688h.pdf [file c3tb21688h.pdf]

## Supporting Information

### **Cu<sup>+</sup> assisted preparation of mesoporous Pt-organic composites for highly selective and sensitive non-enzymatic glucose sensing**

Jing-Fang Huang\*

*Department of Chemistry, National Chung Hsing University, Taichung 402, Taiwan,  
R.O.C.*

\*Corresponding Author. E-mail: jfh@dragon.nchu.edu.tw

**Fig. S1** TEM images of NF(Pt<sub>nano</sub>) composites with Pt loading of (a) ~15 μg cm<sup>-2</sup> and (b) ~200 μg cm<sup>-2</sup>.

**Fig. S2** The high-resolution TEM image of the (NF(Pt<sub>nano</sub>)) composite with Pt loading of ~15 μg cm<sup>-2</sup>

**Fig. S3** XPS spectrum of NF(Pt<sub>nano</sub>) composite.

**Table S1** Analytical performance comparisons of various materials for the non-enzymatic glucose sensing

**Table S2** Determination of glucose in blood serum samples (n = 5).

**Fig. S1**

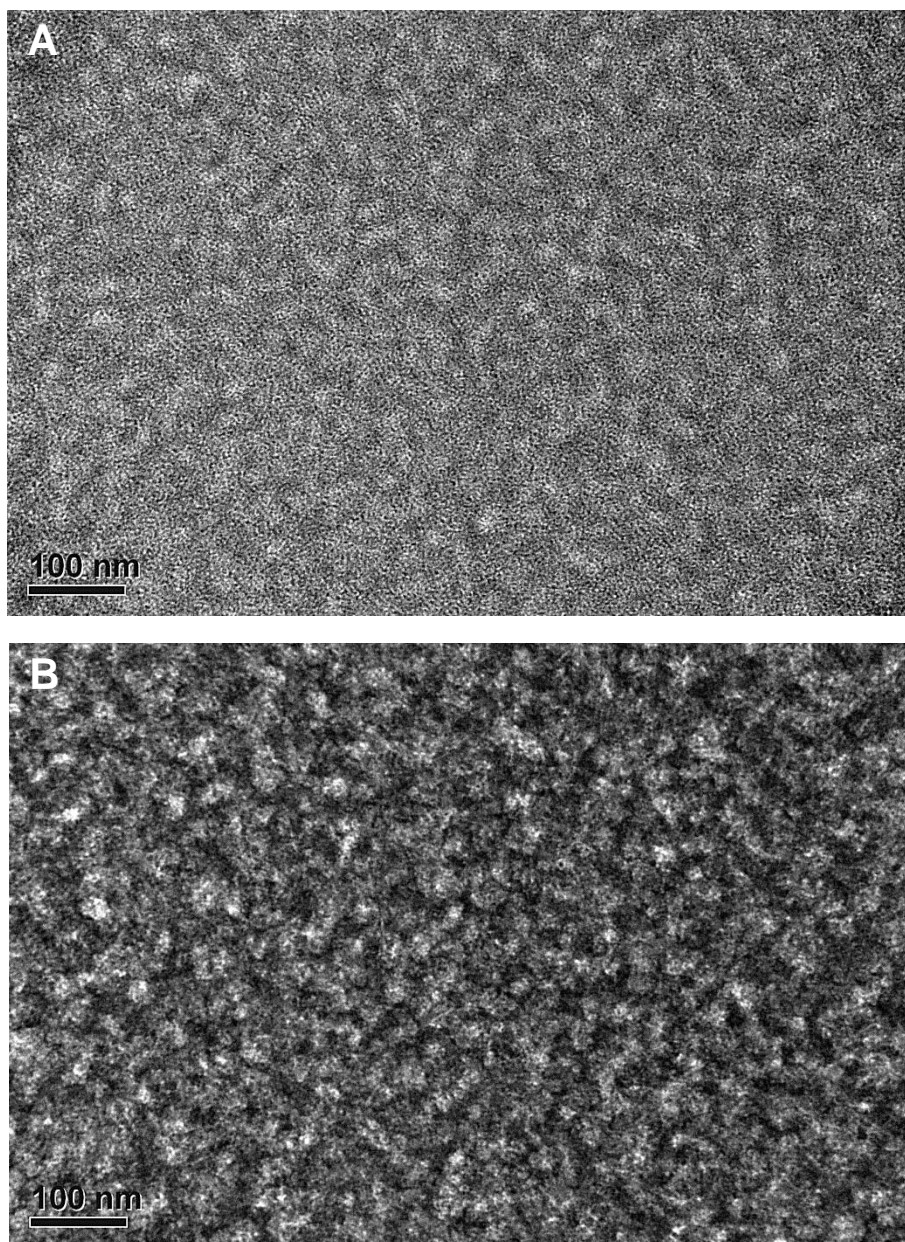

**Fig. S1** TEM images of NF(Pt<sub>nano</sub>) composites with Pt loading of (A)  $\sim 15 \mu\text{g cm}^{-2}$  and (B)  $\sim 200 \mu\text{g cm}^{-2}$ .

**Fig. S2**

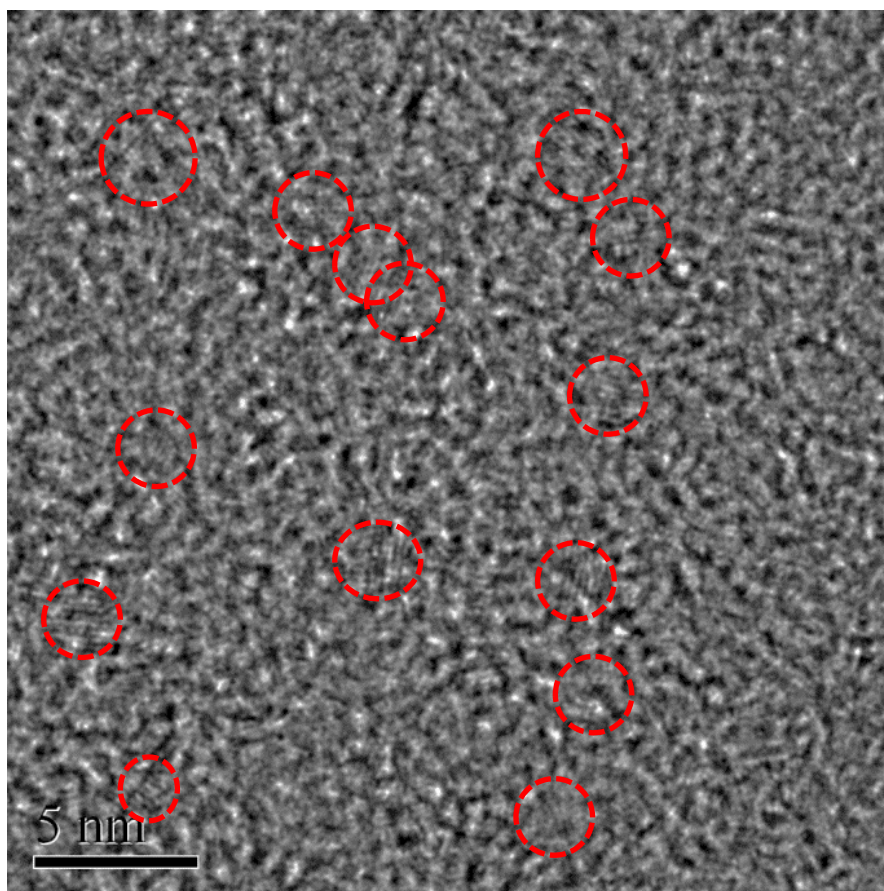

**Fig. S2** The high-resolution TEM image of the (NF(Pt<sub>nano</sub>)) composite with Pt loading of  $\sim 15 \mu\text{g cm}^{-2}$

**Fig S3**

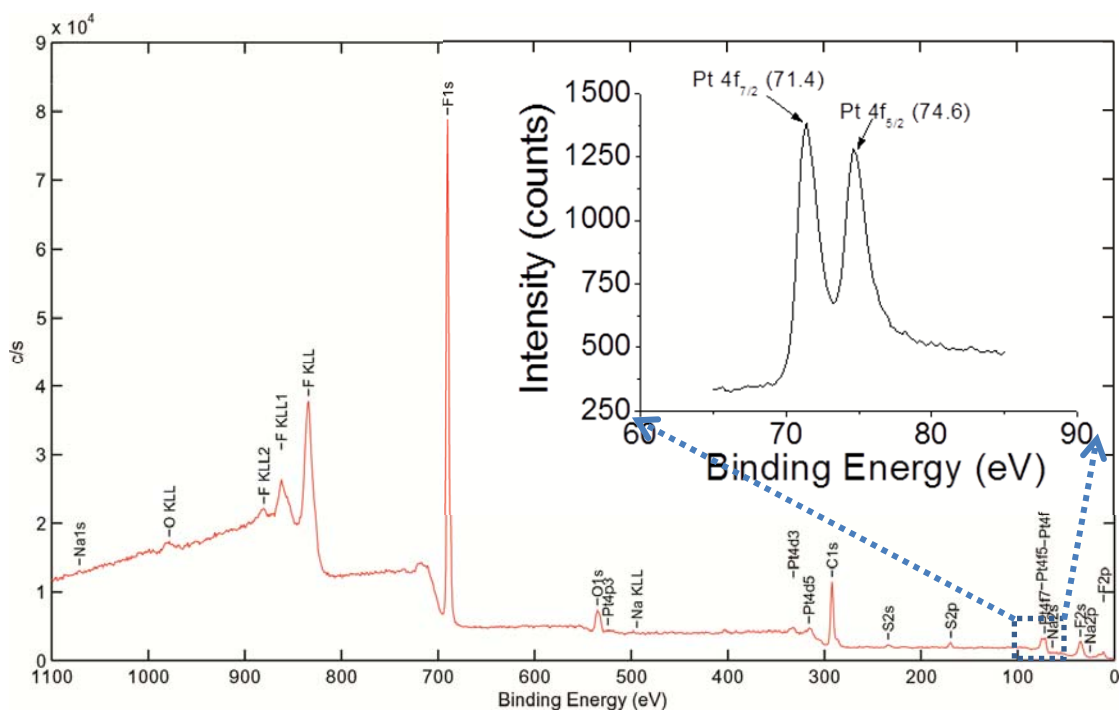

**Fig. S3** XPS spectrum of NF(Pt<sub>nano</sub>) composite.

**Table S1** Analytical performance comparisons of various materials for the non-enzymatic glucose sensing

| Materials                                    | Sensitivity<br>( $\mu\text{A cm}^{-2} \text{mM}^{-1}$ ) | Linear range<br>(mM) | Detection<br>limit<br>(mM) | Applied Potential<br>(V vs. Ag/AgCl) | Ref.      |
|----------------------------------------------|---------------------------------------------------------|----------------------|----------------------------|--------------------------------------|-----------|
| Mesoporous Pt                                | 9.6                                                     | 1-10                 | Not given                  | 0.4                                  | 9         |
| Nanoporous PtPb                              | 10.8                                                    | 1-16                 | Not given                  | 0.4                                  | 10        |
| Pt Nanotube Arrays                           | 0.1                                                     | 2-14                 | 0.001                      | 0.4                                  | 40        |
| Porous Au                                    | 11.8                                                    | 2-10                 | 0.005                      | 0.35                                 | 51        |
| Pt-Pb alloy<br>nano-particles-MWCNTs         | 17.8                                                    | 1-11                 | 0.0018                     | 0.3                                  | 52        |
| Cu-BDD microelectrode array                  | 9.2                                                     | 1-5                  | Not given                  | 0.6                                  | 41        |
| Microelectrode array NF(Pt <sub>nano</sub> ) | 7.5                                                     | 1-15                 | 0.05                       | 0.4                                  | this work |
| Mesoporous NF(Pt <sub>nano</sub> )           | 12.7-39.5                                               | 0.1-20               | 0.005                      | 0.4                                  | this work |

**Table S2** Determination of glucose in blood serum samples (n = 5)

| Serum sample | [Glucose]<br>(mM)   | Glucose added<br>(mM) | Glucose found<br>(mM) | Recovery<br>(%) |
|--------------|---------------------|-----------------------|-----------------------|-----------------|
| #1           | 0.2 ( $\pm 0.012$ ) | 0.1                   | 0.30 ( $\pm 0.010$ )  | 100             |
|              |                     | 0.2                   | 0.41 ( $\pm 0.013$ )  | 98.5            |
| #2           | 0.6 ( $\pm 0.011$ ) | 0.1                   | 0.71 ( $\pm 0.012$ )  | 98              |
|              |                     | 0.2                   | 0.82 ( $\pm 0.010$ )  | 105             |
